# Supplementary material for: Frequency of heterotic hybrids in relation to general combining ability of parents in sweet corn
Source: PeerJ. 2023 Dec 19;11:e16134. doi: 10.7717/peerj.16134 (PMC10740663; doi:10.7717/peerj.16134)
Supplement: Supplemental Information 1 [file peerj-11-16134-s001.xlsx]

## Sheet: Table S1 & Table S2
	Table S1: Estimation of overall GCA status of parenatal lines based on their GCA effects
gca effects	DFT	DFS	PH	EH	EL	EG	NKR	KPR	TSS	GEY	DEW	GFW	TLB	total
MRCSC9	5	5	5	4	3	4	6	3	1	5	4	4	2	51	L
KH1831	7	6.5	2	1	7	2	3	4	4	3	3	2	6	50.5	L
SC Sel 1	3	3	7	6	4	5	7	5	7	4	5	6	5	67	H
SC Sel 2	6	6.5	4	5	5	3	4	7	5	7	7	5	4	68.5	H
SC Sel 3	4	4	3	2	6	7	5	6	3	6	6	3	3	58	H
SC Syn	2	2	6	7	2	6	2	2	2	2	2	7	1	43	L
SC Ind	1	1	1	3	1	1	1	1	6	1	1	1	7	26	L
													Grand total	364
													Final norm	52
	Table S2: Estimation of overall SCA status of hybrids based on their SCA effects
SCA EFFECTS	DFT	DFS	PH	EH	EL	EG	KRN	KPR	TSS	DEW	GEY	GFW	TLB
MRCSC9 x KH1831	16.5	8	29	33	9	29.5	11	6	27	19	22	23	15	248	L
MRCSC9 x SC Sel 1	26	17	23	27	36	29.5	40	33.5	16	16	17	39	21	341	H
MRCSC9 x SC Sel 2	24.5	27	21	10	13	24	8.5	35	33	27	28	12	23	286	H
MRCSC9 x SC Sel 3	3	7	25	26	4	16	24	11	22	26	32	28	36	260	L
MRCSC9 x SC Syn	16.5	22	15	3	10	21	16.5	8	8	6	15	17	22	180	L
MRCSC9 x SC Ind	8	21	18	23	21	11	6	14	32	21	20	15	19	229	L
KH1831 x MRCSC9	1	6	32	34	16	14	21.5	17	13	11	9	26	7	207.5	L
KH1831 x SC Sel 1	30	2.5	13	7	23	33	23	36	35	31	25	18	29	305.5	H
KH1831 x SC Sel 2	24.5	9	26	19	30	36	36	32	36	35	35	32	34	384.5	H
KH1831 x SC Sel 3	22	32	22	24	27	22	41	13	15	29	33	33	20	333	H
KH1831 x SC Syn	2	2.5	38	30	2	39	3	5	12	5	8	22	5	173.5	L
KH1831 x SC Ind	37	28.5	4	32	18	1	31	9	3	4	3	16	38	224.5	L
SC Sel 1x MRCSC9	19	37	31	15	34	37	34	33.5	26	33	30	40	8.5	378	H
SC Sel 1x KH1831	35.5	26	1	1	24	18.5	29	23	18	24	24	13	8.5	245.5	L
SC Sel 1 x SC Sel 2	7	24	20	20	20	23	27	12	2	3	16	3	33	210	L
SC Sel 1 x SC Sel 3	4	10	28	12	15	35	5	26	1	23	21	30	13	223	L
SC Sel 1x SC Syn	38	30	2	11	31	2	32	18	34	12	10	1	42	263	L
SC Sel 1x SC Ind	27	23	37	39	26	8	2	20	30	28	29	25	4	298	H
SC Sel 2 x MRCSC9	9	13.5	17	9	39	5	4	1	24.5	1	2	11	6	142	L
SC Sel 2 x KH1831	13.5	19	14	17	22	20	21.5	25	20.5	15	12	8	24	231.5	L
SC Sel 2 x SC Sel 1	19	11.5	33	6	5	9	28	2	37	10	7	7	39.5	214	L
SC Sel 2 x SC Sel 3	40	39	16	16	33	3	26	29	7	22	13	19	26	289	H
SC Sel 2x SC Syn	5	4	36	36	35	12	10	24	23	18	6	35	31	275	L
SC Sel 2 x SC Ind	33	28.5	8.5	35	12	4	16.5	10	29	2	5	24.5	41	248.889	L
SC Sel 3 x MRCSC9	10	5	30	28	14	34	14	16	14	20	23	14	35	257	L
SC Sel 3x KH1831	28.5	25	27	13	32	27	18	31	11	8	4	9	10.5	244	L
SC Sel 3 x SC Sel 1	41	41	10	18	19	17	30	19	1	37	40	42	30	345	H
SC Sel 3 x SC Sel 2	13.5	11.5	5	14	1	13	7	3.5	9	17	26	4	32	156.5	L
SC Sel 3x SC Syn	34	31	19	29	25	28	8.5	30	19	30	31	31	16	331.5	H
SC Sel 3x SC Ind	6	16	3	8	17	25	19.5	15	40	7	11	5	25	197.5	L
SC Syn x MRCSC9	23	13.5	24	21	3	15	14	3.5	6	9	18	21	28	199	L
SC Syn x KH1831	31	19	11	4	7	10	39	7	28	14	14	10	14	208	L
SC Syn x SC Sel 1	19	1	7	5	8	6.5	12	21	39	25	1	6	39.5	190	L
SC Syn x SC Sel 2	39	40	6	2	29	18.5	25	27	38	39	37	20	17	337.5	H
SC Syn x SC Sel 3	28.5	19	8.5	22	11	6.5	14	22	42	32	34	27	37	303.5	H
SC Syn x SC Ind	11	15	12	31	6	26	19.5	28	5	13	19	2	27	214.5	L
SC Ind x MRCSC9	42	42	35	37	38	40	37.5	41	17	38	41	29	12	449.5	H
SC Ind x KH1831	32	38	42	40.5	42	42	42	42	41	41	38	41	3	484.5	H
SC Ind x SC Sel 1	35.5	33	34	40.5	40	31.5	34	38	10	42	42	38	18	436.5	H
SC Ind x SC Sel 2	21	36	40	38	37	41	34	39	31	40	39	37	1	434	H
SC Ind x SC Sel 3	13.5	34.5	41	42	41	38	37.5	40	20.5	34	27	34	2	405	H
SC Ind x SC Syn	13.5	34.5	39	25	28	31.5	1	37	4	36	36	36	10.5	332	H
													Grand total	11715.9
													Final norm	278.95

## Sheet: Table S3 & Table S4
	Table S3: Estimation of overall better parent heterosis in hybrids based on their better parent heterotic values
CROSSES	DFT	DFS	PH	EH	EL	EG	KRN	KPR	Brix	DEW	GEY	GFW	TLB	TOTAL score	Overall status
MRCSC9 x KH1831	1	1	23	34	33	35	21.5	36	13	32	35	18	3.5	286	H
MRCSC9 x SC Sel 1	22	17	20	29	17	31	32	14	4	17	17	26	30	276	L
MRCSC9 x SC Sel 2	10	5	39	25	40	42	42	41	24	34	38	40	2	382	H
MRCSC9 x SC Sel 3	8	6	29	20	6	17	23.5	23	8	19	20	16	9	204.5	L
MRCSC9 x SC Syn	27	29	35	13	12	30	12.5	17	15	33	37	23	40	323.5	H
MRCSC9 x SC Ind	20.5	15	9	18.5	1	7	10	1	5	2	2	9	32	132	L
KH1831 x MRCSC9	5	2	25	36	27	40	27.5	38	31	28	39	17	6	321.5	H
KH1831 x SC Sel 1	7	30	6	12	25	36	18	15	11	31	27	20	24.5	262.5	L
KH1831 x SC Sel 2	39	20	33	1	37	34	3	31	32	24	32	7	35.5	328.5	H
KH1831 x SC Sel 3	9	10.5	34	2	39	28	37	39	27	26	26	31	19.5	328	H
KH1831 x SC Syn	20.5	22.5	30	5.5	35	22	40	37	39	40	36	39	14	380.5	H
KH1831 x SC Ind	2	7.5	4	22	23	8.5	25.5	13	36	9	8	5	6	169.5	L
SC Sel 1x MRCSC9	17.5	25	17	10	9	38	39	9	10	14	12	21	18	239.5	L
SC Sel 1x KH1831	19	26	11	32	41	29	41	25	28	23	19	24	19.5	337.5	H
SC Sel 1 x SC Sel 2	29	39.5	10	30.5	21.5	25	37	20.5	7	16	16	25	24.5	301.5	H
SC Sel 1 x SC Sel 3	31	18	22	30.5	29	26	32	35	33	22	21	22	41	362.5	H
SC Sel 1x SC Syn	40	38	16	16	5	15	5.5	20.37	37	27	28	36	39	322.87	H
SC Sel 1x SC Ind	15.5	28	14	14	3	4	20	2	21	3	3	1	42	170.5	L
SC Sel 2 x MRCSC9	3	4	26.5	11	21.5	41	34.5	32	25	38	42	38	14	330.5	H
SC Sel 2 x KH1831	41	41	32	15	24	39	34.5	20.5	42	30	25	8	35.5	387.5	H
SC Sel 2 x SC Sel 1	32	37	21	37	31	18	21.5	28	19	37	33	32	3.5	350	H
SC Sel 2 x SC Sel 3	24	16	42	24	32	37	29.5	42	9	36	34	27	27	379.5	H
SC Sel 2x SC Syn	14	42	36	8.5	30	20.5	37	33	40	42	40	34	14	391	H
SC Sel 2 x SC Ind	13	13	2	33	15	10	15	16	14	8	9	4	16.5	168.5	L
SC Sel 3 x MRCSC9	17.5	9	18	28	14	32	23.5	22	16.5	25	24	28	12	269.5	L
SC Sel 3x KH1831	11	10.5	40	26	34	11	27.5	30	1	21	23	29	21.5	285.5	H
SC Sel 3 x SC Sel 1	23	21	15	17	38	19	32	29	26	35	29	35	26	345	H
SC Sel 3 x SC Sel 2	33	31	41	35	19	24	29.5	34	22	20	22	33	16.5	360	H
SC Sel 3x SC Syn	35	22.5	31	5.5	18	14	14	18	6	29	30	41	23	287	H
SC Sel 3x SC Ind	12	13	1	41	10	2	25.5	3	16.5	12	15	13	37	201	L
SC Syn x MRCSC9	38	34	37	5.5	26	33	5.5	26	23	13	18	14	30	303	H
SC Syn x KH1831	4	3	38	8.5	42	12	16	40	34	39	31	42	6	315.5	H
SC Syn x SC Sel 1	34	35	13	5.5	28	20.5	4	19	20	18	13	12	33.5	255.5	L
SC Syn x SC Sel 2	25	32	28	18.5	20	23	12.5	24	41	41	41	37	11	354	H
SC Syn x SC Sel 3	42	33	24	21	36	27	9	27	35	15	14	30	9	322	H
SC Syn x SC Ind	26	27	5	3	8	8.5	11	7	18	7	7	6	28	161.5	L
SC Ind x MRCSC9	30	19	19	38	4	13	1	4	29	5	4	11	30	207	L
SC Ind x KH1831	6	7.5	7	40	16	1	19	6	38	10	10	3	21.5	185	L
SC Ind x SC Sel 1	36.5	39.5	26.5	39	11	5	7.5	8	3	1	1	15	38	231	L
SC Ind x SC Sel 2	15.5	24	12	27	13	16	17	12	2	6	6	10	1	161.5	L
SC Ind x SC Sel 3	28	13	8	42	7	3	7.5	14	30	11	11	19	9	202.5	L
SC Ind x SC Syn	36.5	36	3	23	2	6	2	10	12	4	5	2	33.5	175	L
													Final norm	279.937
		Table S4: Estimation of overall stanadard heterosis over the best check Misthi in hybrids based on their standard heterosis values
CROSSES	DFT	DFS	PH	EH	EL	EG	KRN	KPR	DEW	GFW	Brix	TSS	GEY	TOTAL score	Overall status
MRCSC9 x KH1831	7.5	7	14	27	29	4	15	20.5	27	12	12	3	15	193	L
MRCSC9 x SC Sel 1	33.5	30	37	30	9	17.5	15	4.5	12	25	6.5	8	10	238	L
MRCSC9 x SC Sel 2	22	14.5	40	24	39	42	42	40	30	42	9	13	25.5	383	H
MRCSC9 x SC Sel 3	19	19	21	6.5	1.5	7	7.5	14	18	10	4	22	16	165.5	L
MRCSC9 x SC Syn	36.5	36.5	34	22.5	7	36	25	9	28	19	34	6	34	327.5	H
MRCSC9 x SC Ind	31.5	29	28	5	1.5	21.5	15	1	6	26.5	12	2	9	188	L
KH1831 x MRCSC9	16.5	3	15	28.5	23	30	20	26.5	25	11	17	19.5	28	263	L
KH1831 x SC Sel 1	3.5	19	11	12	16	25	11	7	24	13	35.5	21	23	221	L
KH1831 x SC Sel 2	10.5	7	4	2	38	1	1	23	5	1	41.5	23	6	163	L
KH1831 x SC Sel 3	2	3	1	1	27	26	33.5	37	31	9	30	35	31	266.5	L
KH1831 x SC Syn	7.5	22	10	12	35	28	37	39	34	17	24	33	32	330.5	H
KH1831 x SC Ind	7.5	7	18	3	41	28	40	28	20	18	17	11	22	260.5	L
SC Sel 1x MRCSC9	29	34.5	32	9	4	33.5	25	2	4	14	1.5	19.5	4	212	L
SC Sel 1x KH1831	7.5	14.5	20	34.5	40	14.5	40	26.5	14	22	30	32	12	307.5	H
SC Sel 1 x SC Sel 2	19	38	19	32.5	14.5	8	33.5	19	7	23	35.5	12	7	268	L
SC Sel 1 x SC Sel 3	22	10.5	39	32.5	24	21.5	15	36	23	20.5	39.5	38.5	20	342	H
SC Sel 1x SC Syn	36.5	39.5	30	25	3	10.5	7.5	3	19	39	30	38.5	24	305.5	H
SC Sel 1x SC Ind	25.5	27	36	18	8	16	37	4.5	8	3	39.5	30	11	263.5	L
SC Sel 2 x MRCSC9	13	10.5	17	8	14.5	37	29.5	29	42	41	24	14	38	317.5	H
SC Sel 2 x KH1831	16.5	39.5	3	15	17	2	29.5	12	1	2	41.5	42	3	224	L
SC Sel 2 x SC Sel 1	25.5	32	38	41	32	5	15	31	37	31	12	28	37	364.5	H
SC Sel 2 x SC Sel 3	10.5	7	27	22.5	33	38	25	42	41	24	37.5	24	42	373.5	H
SC Sel 2x SC Syn	5	19	24	19.5	31	23.5	33.5	35	40	34	24	36.5	39	364	H
SC Sel 2 x SC Ind	22	14.5	9	36	30	31.5	25	38	17	16	27	4	25.5	295.5	H
SC Sel 3 x MRCSC9	29	27	6	17	6	33.5	7.5	12	29	26.5	9	26.5	30	259	L
SC Sel 3x KH1831	3.5	3	2	4	18.5	3	20	22	22	7	32.5	9	27	173.5	L
SC Sel 3 x SC Sel 1	13	14.5	29	21	37	14.5	15	33	39	38	21.5	34	33	342.5	H
SC Sel 3 x SC Sel 2	25.5	22	13	39	12	19.5	22	31	21	29	27	31	21	313	H
SC Sel 3x SC Syn	31.5	22	12	12	11	9	29.5	16	33	32	17	15.5	35	275.5	L
SC Sel 3x SC Ind	19	14.5	7	16	21.5	12	40	6	36	33	37.5	26.5	40	309	H
SC Syn x MRCSC9	42	41.5	35	12	21.5	39	7.5	31	3	5	17	17	2	273.5	L
SC Syn x KH1831	1	1	31	19.5	42	6	33.5	41	32	35	17	25	13	297	H
SC Syn x SC Sel 1	29	34.5	23	12	26	23.5	4	17	10	4	17	29	5	234	L
SC Syn x SC Sel 2	13	27	8	28.5	13	31.5	25	24.5	38	36	21.5	41	41	348	H
SC Syn x SC Sel 3	39	32	5	31	36	35	15	34	9	8	4	40	8	296	H
SC Syn x SC Ind	33.5	24.5	22	6.5	20	28	20	15	16	20.5	9	10	19	244	L
SC Ind x MRCSC9	38	32	41	40	10	40	2	8	13	30	6.5	15.5	14	290	H
SC Ind x KH1831	15	7	25	38	34	10.5	37	12	26	15	32.5	18	29	299	H
SC Ind x SC Sel 1	40.5	41.5	42	42	25	17.5	7.5	18	2	37	27	7	1	308	H
SC Ind x SC Sel 2	25.5	24.5	33	26	28	41	29.5	24.5	15	28	1.5	1	18	295.5	H
SC Ind x SC Sel 3	35	14.5	26	37	18.5	13	7.5	10	35	40	4	36.5	36	313	H
SC Ind x SC Syn	40.5	36.5	16	34.5	5	19.5	3	20.5	11	6	17	5	17	231.5	L
													Final norm	279.5
